# Supplementary material for: Crystal structure, semiconducting and photoluminescence (PL) properties of hybrid tin perovskite-like materials: [Cl–(CH2)2–NH3]2SnCl6 and [Cl–(CH2)2–NH3]2SnBr5.65Cl0.35
Source: Royal Society of Chemistry journal article supplement (doi:10.1039/d4nj01858c), 2024-01-01
Supplement: d4nj01858c1.pdf [file d4nj01858c1.pdf]

## Supplementary Information for:

# Crystal Structure, Semiconducting and Photoluminescence (PL) Properties in Hybrid Tin Perovskites-Like Materials: $[\text{Cl}-(\text{CH}_2)_2-\text{NH}_3]_2\text{SnCl}_6$ and $[\text{Cl}-(\text{CH}_2)_2-\text{NH}_3]_2\text{SnBr}_{5.65}\text{Cl}_{0.35}$

Amal Elghoul,<sup>a</sup> Fadhel Hajlaoui,<sup>a\*</sup> Karim Karoui,<sup>b, c</sup> Magali Allain,<sup>d</sup> Nicolas Mercier,<sup>d</sup>  
Erika Kozma,<sup>e</sup> Chiara Botta,<sup>e</sup> Nabil Zouari<sup>a</sup>

<sup>a</sup> Laboratoire Physico-chimie de l'Etat Solide, Département de Chimie, Faculté des Sciences de Sfax, B.P. 1171, 3000 Sfax, Université de Sfax, Tunisia

<sup>b</sup> Laboratoire des caractérisations spectroscopiques et optique des matériaux, Faculté des Sciences de Sfax, B.P. 1171, 3000 Sfax, Université de Sfax, Tunisia

<sup>c</sup> GREMAN UMR, 7347-CNRS, CEA, INSACVL, Université de Tours, Blois, France

<sup>d</sup> MOLTECH Anjou, UMR-CNRS 6200, Univ Angers, 2 Bd Lavoisier, 49045 Angers, France.

<sup>e</sup> Istituto di Scienze e Tecnologia Chimiche "G. Natta" (SCITEC), CNR. Via A. Corti 12, 20133 Milano, Italy.

*\*Corresponding Authors' E-mail:*

## Table of Content:

**Table S1.** Crystal data for  $[\text{Cl}-(\text{CH}_2)_2-\text{NH}_3]_2\text{SnCl}_6$  (**1**) and  $[\text{Cl}-(\text{CH}_2)_2-\text{NH}_3]_2\text{SnBr}_{5.65}\text{Cl}_{0.35}$  (**2**)

**Table S2.** Selected bond lengths (Å) and angles (°) for  $[\text{Cl}-(\text{CH}_2)_2-\text{NH}_3]_2\text{SnCl}_6$  (**1**).

**Table S3.** Selected bond lengths (Å) and angles (°) for  $[\text{Cl}-(\text{CH}_2)_2-\text{NH}_3]_2\text{SnBr}_{5.65}\text{Cl}_{0.35}$  (**2**).

**Table S4.** Hydrogen-bonding geometry (Å, °) for  $[\text{Cl}-(\text{CH}_2)_2-\text{NH}_3]_2\text{SnCl}_6$  (**1**).

**Table S5.** Hydrogen-bonding geometry (Å, °) for  $[\text{Cl}-(\text{CH}_2)_2-\text{NH}_3]_2\text{SnBr}_{5.65}\text{Cl}_{0.35}$  (**2**)

**Figure S1.** IR spectrum of  $[\text{Cl}-(\text{CH}_2)_2-\text{NH}_3]_2\text{SnCl}_6$  (**1**)

**Figure S2.** IR spectrum of  $[\text{Cl}-(\text{CH}_2)_2-\text{NH}_3]_2\text{SnBr}_{5.65}\text{Cl}_{0.35}$  (**2**)

**Figure S3.** DSC heating curves for compounds  $[\text{Cl}-(\text{CH}_2)_2-\text{NH}_3]_2\text{SnCl}_6$  (**1**) (**a**) and  $[\text{Cl}-(\text{CH}_2)_2-\text{NH}_3]_2\text{SnBr}_{5.65}\text{Cl}_{0.35}$  (**2**) (**b**).

**Figure S4.** PL and PL excitation spectra of  $[\text{Cl}-(\text{CH}_2)_2-\text{NH}_3]_2\text{SnCl}_6$  (1) crystals ( $\lambda_{\text{exc}}=350\text{nm}$ , blue solid line;  $\lambda_{\text{exc}}=450\text{nm}$ , green solid line;  $\lambda_{\text{em}}=435\text{nm}$ , blue dashed line;  $\lambda_{\text{em}}=525\text{nm}$ , green dashed line)

**Figure S5.** PL ( $\lambda_{\text{exc}}=350\text{nm}$ , blue line;  $\lambda_{\text{exc}}=450\text{nm}$ , green line) spectra of  $[\text{Cl}-(\text{CH}_2)_2-\text{NH}_3]_2\text{SnCl}_6$  (1) cast film from Ethanol

**Figure S6.** Normalized PL and PL excitation spectra of  $[\text{Cl}-(\text{CH}_2)_2-\text{NH}_3]_2\text{SnBr}_{5.65}\text{Cl}_{0.35}$  (2) crystalline powders.  $\lambda_{\text{ex}}=350\text{nm}$ , blue line  $\lambda_{\text{ex}}=450\text{nm}$ , green line;  $\lambda_{\text{em}}=475\text{nm}$ , blue dashed line;  $\lambda_{\text{em}}=560\text{nm}$ , green dashed line.

**Figure S7.** Images  $[\text{Cl}-(\text{CH}_2)_2-\text{NH}_3]_2\text{SnBr}_{5.65}\text{Cl}_{0.35}$  (2) crystals taken with optical and fluorescence microscopy. From the left to the right: cross polarized optical image; fluorescence image, UV light excitation. Scale bar is  $30\mu\text{m}$ .

**Figure S8.** Normalized photoluminescence (PL) spectrum of  $[\text{Cl}-(\text{CH}_2)_2-\text{NH}_3]_2\text{SnBr}_{5.65}\text{Cl}_{0.35}$  (2) cast films from water solution;  $\lambda_{\text{ex}}=350\text{nm}$ .

**Table S1.** Crystal data for [Cl-(CH<sub>2</sub>)<sub>2</sub>-NH<sub>3</sub>]<sub>2</sub>SnCl<sub>6</sub> (**1**) and [Cl-(CH<sub>2</sub>)<sub>2</sub>-NH<sub>3</sub>]<sub>2</sub>SnBr<sub>5.65</sub>Cl<sub>0.35</sub> (**2**)

|                                                       |                                                                                                |                                                                                                                      |
|-------------------------------------------------------|------------------------------------------------------------------------------------------------|----------------------------------------------------------------------------------------------------------------------|
| Compound name                                         | (C <sub>4</sub> H <sub>14</sub> N <sub>2</sub> Cl <sub>2</sub> )SnCl <sub>6</sub> ( <b>1</b> ) | (C <sub>4</sub> H <sub>14</sub> N <sub>2</sub> Cl <sub>2</sub> )SnBr <sub>5.65</sub> Cl <sub>0.35</sub> ( <b>2</b> ) |
| Empirical formula                                     | C <sub>4</sub> H <sub>14</sub> N <sub>2</sub> Cl <sub>8</sub> Sn                               | C <sub>4</sub> H <sub>14</sub> N <sub>2</sub> Cl <sub>2</sub> Br <sub>5.65</sub> Cl <sub>0.35</sub> Sn               |
| Color                                                 | Colorless                                                                                      | Colorless                                                                                                            |
| Formula weight (g.mol <sup>-1</sup> )                 | 492.46                                                                                         | 743.66                                                                                                               |
| Temperature (K)                                       | 293                                                                                            | 293                                                                                                                  |
| Crystal system                                        | Monoclinic                                                                                     | Monoclinic                                                                                                           |
| Space group                                           | <i>P2<sub>1</sub>/m</i>                                                                        | <i>P2<sub>1</sub>/m</i>                                                                                              |
| <i>a</i> (Å)                                          | 10.1028(7)                                                                                     | 10.3622(3)                                                                                                           |
| <i>b</i> (Å)                                          | 7.1224(5)                                                                                      | 7.4473 (2)                                                                                                           |
| <i>c</i> (Å)                                          | 11.7984 (7)                                                                                    | 12.3099 (3)                                                                                                          |
| $\alpha, \beta, \gamma$ (°)                           | 90, 108.009(7), 90                                                                             | 90, 109.176(3), 90                                                                                                   |
| <i>V</i> (Å <sup>3</sup> )                            | 807.37(10)                                                                                     | 897.25                                                                                                               |
| <i>Z</i>                                              | 2                                                                                              | 2                                                                                                                    |
| $\rho_{\text{calc}}$ , (g.cm <sup>-3</sup> )          | 2.026                                                                                          | 2.753                                                                                                                |
| Absorption correction                                 | Gaussian                                                                                       | Gaussian                                                                                                             |
| Radiation (Å)                                         | CuK $\alpha$ (1.54184)                                                                         | CuK $\alpha$ (1.54184)                                                                                               |
| $\mu$ (mm <sup>-1</sup> )                             | 24.58                                                                                          | 29.12                                                                                                                |
| Crystal Shape                                         | Prism                                                                                          | Prism                                                                                                                |
| Crystal size                                          | 0.30 × 0.17 × 0.11                                                                             | 0.26 × 0.16 × 0.10                                                                                                   |
| F (000)                                               | 476                                                                                            | 679                                                                                                                  |
| $\theta$ range [°]                                    | 3.9 to 76.2                                                                                    | 3.7 to 76.0                                                                                                          |
| Collected reflections                                 | 6361                                                                                           | 13853                                                                                                                |
| R <sub>int</sub>                                      | 0.054                                                                                          | 0.102                                                                                                                |
| Data/restraints/parameters                            | 1747/7/110                                                                                     | 1881/41/136                                                                                                          |
| R <sub>1</sub> , wR <sub>2</sub> [I > 2 $\sigma$ (I)] | 0.0435, 0.1311                                                                                 | 0.044, 0.1183                                                                                                        |
| R <sub>1</sub> , wR <sub>2</sub> [all data]           | 0.0442, 0.1335                                                                                 | 0.045, 0.1197                                                                                                        |
| Goodness-of-fit on F <sup>2</sup>                     | 1.163                                                                                          | 1.061                                                                                                                |
| Largest diff. peak/hole/e.<br>Å <sup>-3</sup>         | 0.67/−1.46                                                                                     | 1.18/−0.75                                                                                                           |

**Table S2.** Selected bond lengths (Å) and angles (°) for [Cl-(CH<sub>2</sub>)<sub>2</sub>-NH<sub>3</sub>]<sub>2</sub>SnCl<sub>6</sub> (1).

|                                        |             |            |            |
|----------------------------------------|-------------|------------|------------|
| Sn1—C11                                | 2.4322 (15) | C1—C2      | 1.463 (19) |
| Sn1—C12                                | 2.4289 (11) | C1—N1      | 1.488 (12) |
| Sn1—C13                                | 2.4068 (12) | C2—C15     | 1.765 (11) |
| Sn1—C14                                | 2.4298 (15) | C3—N2      | 1.455 (9)  |
| Cl3—Sn1—Cl3 <sup>i</sup>               | 92.11 (7)   | C3—C4      | 1.502 (14) |
| Cl3—Sn1—Cl2 <sup>i</sup>               | 88.77 (5)   | C4—Cl6B    | 1.706 (18) |
| Cl3 <sup>i</sup> —Sn1—Cl2 <sup>i</sup> | 178.78 (4)  | C4—Cl6A    | 1.800 (18) |
| Cl3—Sn1—Cl2                            | 178.78 (4)  | C2—C1—N1   | 111.9 (13) |
| Cl3 <sup>i</sup> —Sn1—Cl2              | 88.77 (5)   | C1—C2—C15  | 109.4 (10) |
| Cl2 <sup>i</sup> —Sn1—Cl2              | 90.33 (6)   | N2—C3—C4   | 111.2 (7)  |
| Cl3—Sn1—Cl4                            | 90.88 (4)   | C3—C4—Cl6B | 115.0 (10) |
| Cl3 <sup>i</sup> —Sn1—Cl4              | 90.88 (4)   | C3—C4—Cl6A | 98.1 (17)  |
| Cl2 <sup>i</sup> —Sn1—Cl4              | 89.95 (4)   |            |            |
| Cl2—Sn1—Cl4                            | 89.95 (4)   |            |            |
| Cl3—Sn1—C11                            | 89.61 (4)   |            |            |
| Cl3 <sup>i</sup> —Sn1—C11              | 89.61 (4)   |            |            |
| Cl2 <sup>i</sup> —Sn1—C11              | 89.55 (4)   |            |            |
| Cl2—Sn1—C11                            | 89.55 (4)   |            |            |
| Cl4—Sn1—C11                            | 179.29 (5)  |            |            |

**Symmetry codes:** (i) x, -y+1/2, z.

**Table S3.** Selected bond lengths (Å) and angles (°) for [Cl-(CH<sub>2</sub>)<sub>2</sub>-NH<sub>3</sub>]<sub>2</sub>SnBr<sub>5.65</sub>Cl<sub>0.35</sub> (2).

|                                        |            |                           |            |
|----------------------------------------|------------|---------------------------|------------|
| Sn1—Cl3 <sup>i</sup>                   | 2.463 (17) | Br3—Sn1—Br2 <sup>i</sup>  | 88.47 (8)  |
| Sn1—Cl3                                | 2.463 (17) | Br2—Sn1—Br2 <sup>i</sup>  | 90.78 (16) |
| Sn1—Br3 <sup>i</sup>                   | 2.5678 (6) | Cl3 <sup>i</sup> —Sn1—Br1 | 90.1 (7)   |
| Sn1—Br3                                | 2.5678 (6) | Cl3—Sn1—Br1               | 90.1 (7)   |
| Sn1—Br2                                | 2.588 (2)  | Br3 <sup>i</sup> —Sn1—Br1 | 89.94 (2)  |
| Sn1—Br2 <sup>i</sup>                   | 2.588 (2)  | Br3—Sn1—Br1               | 89.94 (2)  |
| Sn1—Br1                                | 2.5989 (8) | Br2—Sn1—Br1               | 89.23 (5)  |
| Sn1—Br4                                | 2.6039 (8) | Br2 <sup>i</sup> —Sn1—Br1 | 89.23 (5)  |
| Cl3 <sup>i</sup> —Sn1—Cl3              | 81.4 (16)  | Cl3 <sup>i</sup> —Sn1—Br4 | 88.9 (7)   |
| Cl3 <sup>i</sup> —Sn1—Br3 <sup>i</sup> | 174.6 (8)  | Cl3—Sn1—Br4               | 88.9 (7)   |
| Cl3—Sn1—Br3 <sup>i</sup>               | 93.2 (8)   | Br3 <sup>i</sup> —Sn1—Br4 | 90.99 (2)  |
| Cl3 <sup>i</sup> —Sn1—Br3              | 93.2 (8)   | Br3—Sn1—Br4               | 90.99 (2)  |
| Cl3—Sn1—Br3                            | 174.6 (8)  | Br2—Sn1—Br4               | 89.83 (5)  |
| Br3 <sup>i</sup> —Sn1—Br3              | 92.26 (3)  | Br2 <sup>i</sup> —Sn1—Br4 | 89.83 (5)  |
| Cl3 <sup>i</sup> —Sn1—Br2              | 86.1 (7)   | Br1—Sn1—Br4               | 178.66 (3) |
| Br3 <sup>i</sup> —Sn1—Br2              | 88.47 (8)  | C1—N1                     | 1.468 (15) |
| Br3—Sn1—Br2                            | 178.89 (6) | C1—C2A                    | 1.470 (17) |
| Cl3—Sn1—Br2 <sup>i</sup>               | 86.1 (7)   | C1—C2B                    | 1.54 (2)   |
| Br3 <sup>i</sup> —Sn1—Br2 <sup>i</sup> | 178.89 (6) | C2A—Cl1A                  | 1.769 (19) |
| C3—C4                                  | 1.454 (17) | C2B—Cl1B                  | 1.77 (3)   |
| C4—Cl2B                                | 1.779 (14) | C3—N2                     | 1.446 (11) |
| C4—Cl2A                                | 1.87 (5)   | N1—C1—C2A                 | 117.3 (12) |
|                                        |            | N1—C1—C2B                 | 129 (10)   |
|                                        |            | C1—C2A—Cl1A               | 109.7 (12) |
|                                        |            | C1—C2B—Cl1B               | 94 (2)     |
|                                        |            | N2—C3—C4                  | 113.3 (9)  |
|                                        |            | C3—C4—Cl2B                | 115.2 (11) |
|                                        |            | C3—C4—Cl2A                | 99 (2)     |

**Symmetry codes:** (i)  $x, -y+1/2, z$ .

**Table S4.** Hydrogen-bonding geometry (Å, °) for [Cl-(CH<sub>2</sub>)<sub>2</sub>-NH<sub>3</sub>]<sub>2</sub>SnCl<sub>6</sub> (1).

| <i>D—H···A</i>               | <i>D—H</i> | <i>H···A</i> | <i>D···A</i> | <i>D—H···A</i> |
|------------------------------|------------|--------------|--------------|----------------|
| C2—H2E···Cl2 <sup>i</sup>    | 0.97       | 2.93         | 3.489 (12)   | 118            |
| C4—H4B···Cl3 <sup>ii</sup>   | 0.97       | 2.90         | 3.748 (10)   | 147            |
| C4—H4C···Cl4 <sup>iii</sup>  | 0.97       | 2.93         | 3.734 (12)   | 141            |
| C4—H4B···Cl3 <sup>ii</sup>   | 0.97       | 2.90         | 3.748 (10)   | 147            |
| C4—H4D···Cl4 <sup>iv</sup>   | 0.97       | 2.98         | 3.822 (12)   | 146            |
| N1—H1C···Cl2 <sup>v</sup>    | 0.89       | 2.64         | 3.474 (6)    | 156            |
| N1—H1D···Cl1 <sup>vi</sup>   | 0.89       | 2.69         | 3.5774 (7)   | 174            |
| N1—H1E···Cl1                 | 0.89       | 2.66         | 3.367 (6)    | 137            |
| N1—H1E···Cl3 <sup>vii</sup>  | 0.89       | 2.92         | 3.649 (6)    | 140            |
| N2—H2A···Cl2 <sup>vii</sup>  | 0.89       | 2.71         | 3.349 (5)    | 130            |
| N2—H2A···Cl3                 | 0.89       | 2.89         | 3.681 (6)    | 149            |
| N2—H2B···Cl2 <sup>iii</sup>  | 0.89       | 2.76         | 3.349 (5)    | 125            |
| N2—H2B···Cl2 <sup>viii</sup> | 0.89       | 2.90         | 3.449 (6)    | 122            |
| N2—H2B···Cl4 <sup>iii</sup>  | 0.89       | 2.80         | 3.5778 (7)   | 147            |
| N2—H2C···Cl2 <sup>ix</sup>   | 0.89       | 2.59         | 3.449 (6)    | 164            |

**Symmetry codes:** (i)  $-x+1, y+1/2, -z$ ; (ii)  $-x+2, y+1/2, -z+1$ ; (iii)  $x, y+1, z$ ;  
(iv)  $-x+2, -y+1, -z+1$ ; (v)  $-x+1, -y, -z$ ; (vi)  $-x+1, -y+1, -z$ ; (vii)  $x, -y+1/2, z$ ;  
(viii)  $-x+1, -y+1, -z+1$ ; (ix)  $-x+1, y+1/2, -z+1$ .

**Table S5.** Hydrogen-bonding geometry (Å, °) for [Cl-(CH<sub>2</sub>)<sub>2</sub>-NH<sub>3</sub>]<sub>2</sub>SnBr<sub>5.65</sub>Cl<sub>0.35</sub> (2)

| <i>D</i> —H··· <i>A</i>      | <i>D</i> —H | H··· <i>A</i> | <i>D</i> ··· <i>A</i> | <i>D</i> —H··· <i>A</i> |
|------------------------------|-------------|---------------|-----------------------|-------------------------|
| N1—H1E···Br2 <sup>i</sup>    | 0.89        | 2.72          | 3.587 (7)             | 165                     |
| N1—H1E···Cl3 <sup>i</sup>    | 0.89        | 2.90          | 3.77 (3)              | 164                     |
| N1—H1F···Br1 <sup>ii</sup>   | 0.89        | 2.89          | 3.7443 (8)            | 162                     |
| N1—H1G···Br1 <sup>iii</sup>  | 0.89        | 2.82          | 3.478 (8)             | 132                     |
| N1—H1G···Br3 <sup>iv</sup>   | 0.89        | 3.10          | 3.861 (6)             | 145                     |
| C2A—H2B···Br2 <sup>i</sup>   | 0.97        | 3.13          | 3.97 (2)              | 146                     |
| C4—H4B···Br3 <sup>v</sup>    | 0.97        | 2.85          | 3.706 (13)            | 147                     |
| C4—H4C···Br4 <sup>vi</sup>   | 0.97        | 3.00          | 3.829 (15)            | 144                     |
| C4—H4B···Br3 <sup>v</sup>    | 0.97        | 2.85          | 3.706 (13)            | 147                     |
| C4—H4D···Br4 <sup>vii</sup>  | 0.97        | 3.13          | 3.941 (15)            | 142                     |
| N2—H2E···Br2 <sup>viii</sup> | 0.89        | 2.83          | 3.467 (6)             | 130                     |
| N2—H2E···Br3                 | 0.89        | 3.08          | 3.866 (7)             | 149                     |
| N2—H2E···Cl3 <sup>viii</sup> | 0.89        | 2.96          | 3.59 (3)              | 129                     |
| N2—H2F···Br2 <sup>vi</sup>   | 0.89        | 2.88          | 3.467 (6)             | 125                     |
| N2—H2F···Br2 <sup>ii</sup>   | 0.89        | 3.03          | 3.593 (8)             | 123                     |
| N2—H2F···Br4 <sup>vi</sup>   | 0.89        | 2.97          | 3.7449 (8)            | 146                     |
| N2—H2F···Cl3 <sup>vi</sup>   | 0.89        | 2.96          | 3.59 (3)              | 129                     |
| N2—H2F···Cl3 <sup>ii</sup>   | 0.89        | 2.90          | 3.42 (3)              | 120                     |
| N2—H2G···Br2 <sup>ix</sup>   | 0.89        | 2.73          | 3.593 (8)             | 165                     |
| N2—H2G···Cl3 <sup>ix</sup>   | 0.89        | 2.56          | 3.42 (3)              | 163                     |

**Symmetry codes:** (i)  $-x+1, -y, -z+1$ ; (ii)  $-x+1, -y+1, -z+1$ ; (iii)  $x, y, z+1$ ; (iv)  $x, -y+1/2, z+1$ ; (v)  $-x+2, y+1/2, -z+1$ ; (vi)  $x, y+1, z$ ; (vii)  $-x+2, -y+1, -z+1$ ; (viii)  $x, -y+1/2, z$ ; (ix)  $-x+1, y+1/2, -z+1$ .

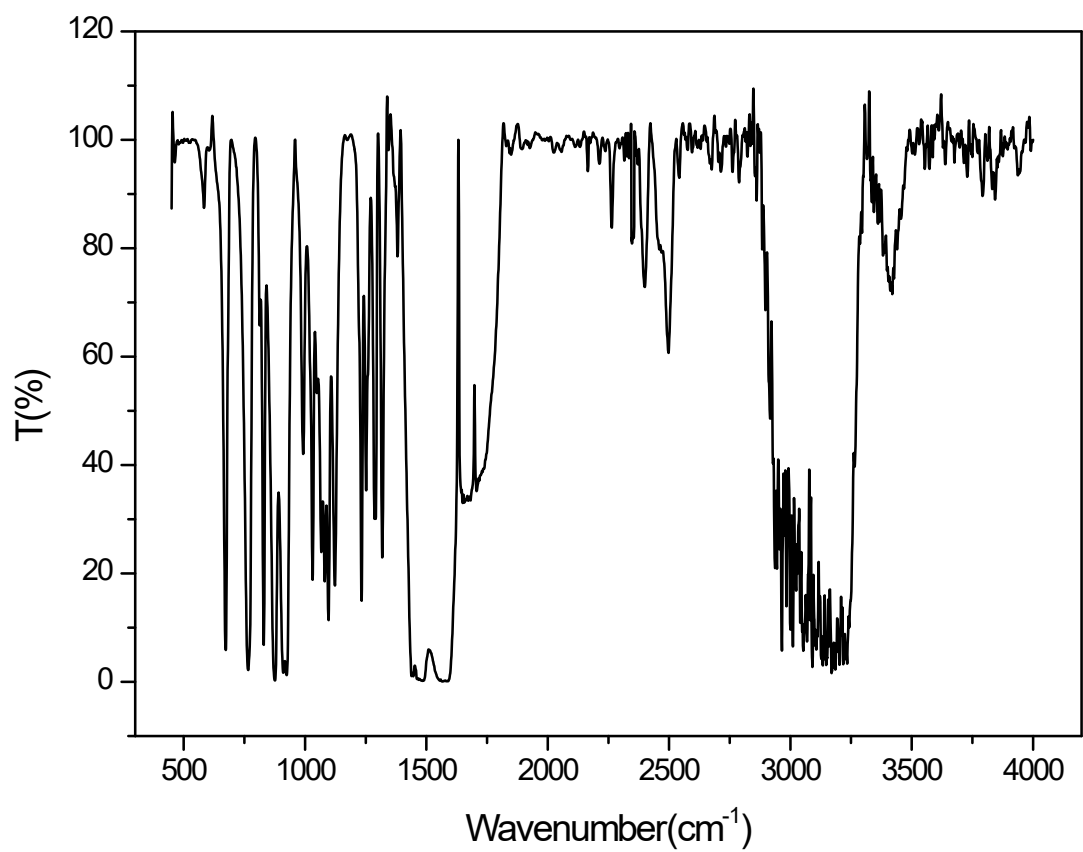

**Figure S1.** IR spectrum of  $[\text{Cl}-(\text{CH}_2)_2-\text{NH}_3]_2\text{SnCl}_6$  (1)



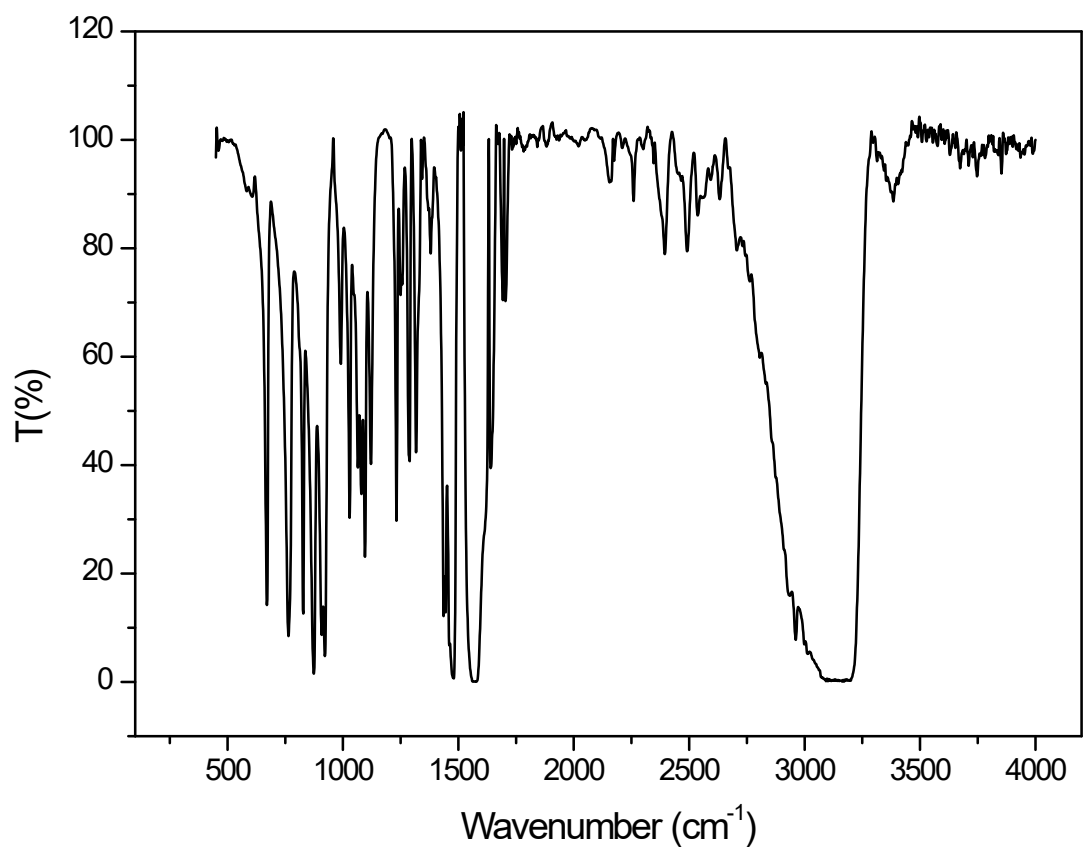

**Figure S2.** IR spectrum of  $[\text{Cl}-(\text{CH}_2)_2-\text{NH}_3]_2\text{SnBr}_{5.65}\text{Cl}_{0.35}$  (2).

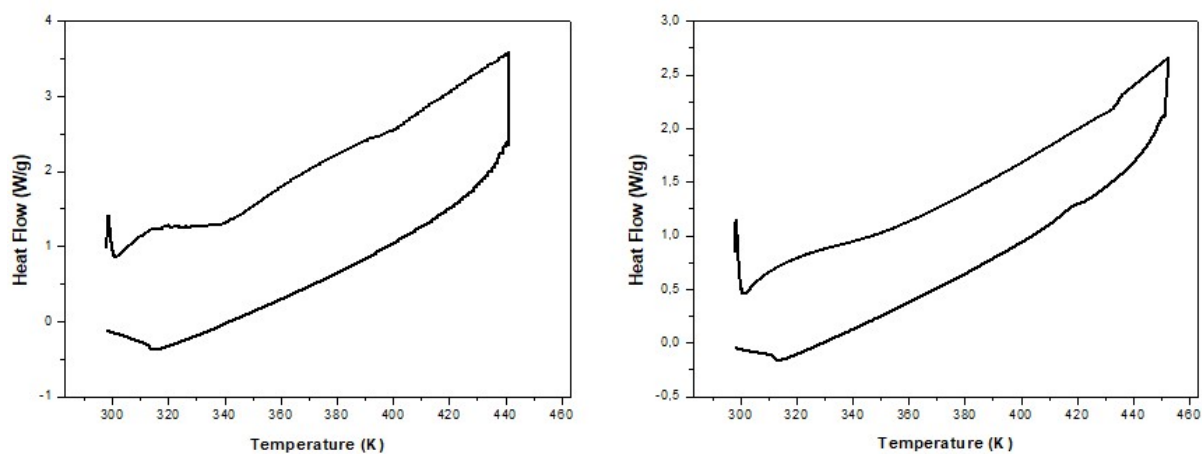

**Figure S3.** DSC heating and cooling curves for compounds  $[\text{Cl}-(\text{CH}_2)_2-\text{NH}_3]_2\text{SnCl}_6$  (1) (a) and  $[\text{Cl}-(\text{CH}_2)_2-\text{NH}_3]_2\text{SnBr}_{5.65}\text{Cl}_{0.35}$  (2) (b).

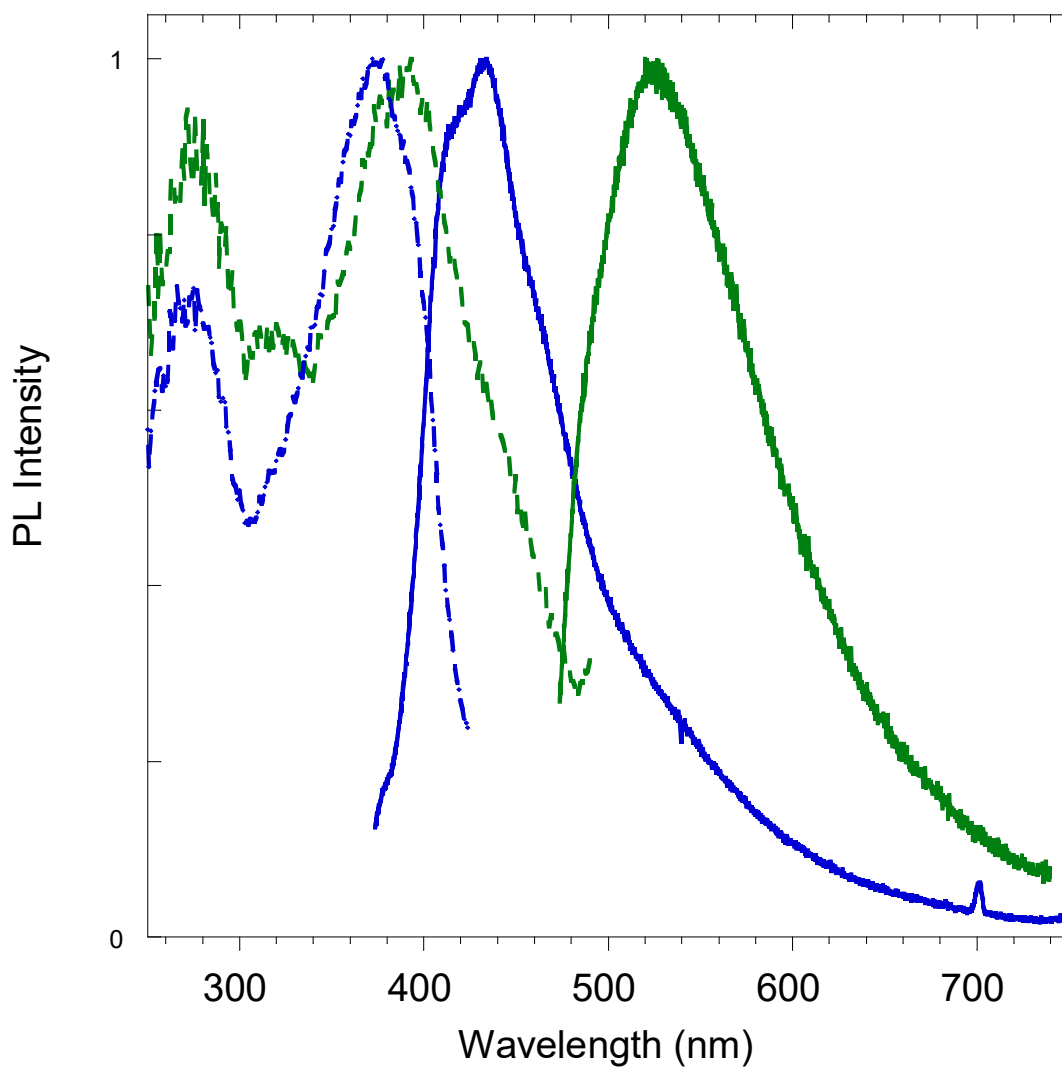

**Figure S4.** PL and PL excitation spectra of [Cl-(CH<sub>2</sub>)<sub>2</sub>-NH<sub>3</sub>]<sub>2</sub>SnCl<sub>6</sub> (1) crystals ( $\lambda_{\text{exc}}=350\text{nm}$ , blue solid line;  $\lambda_{\text{exc}}=450\text{nm}$ , green solid line;  $\lambda_{\text{em}}=435\text{ nm}$ , blue dashed line;  $\lambda_{\text{em}}=525\text{nm}$ , green dashed line)

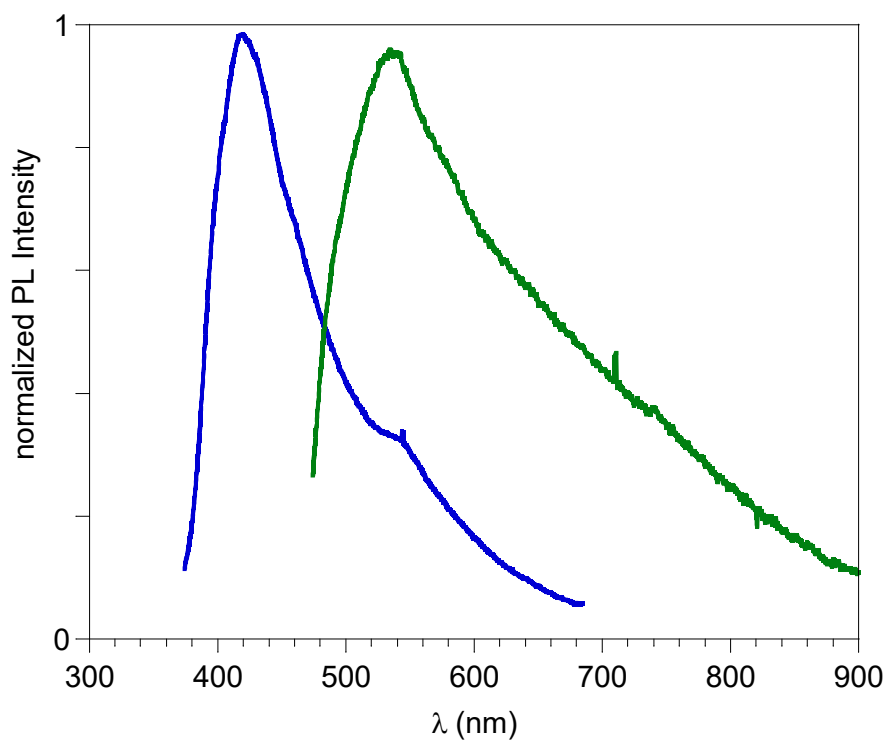

**Figure S5.** PL ( $\lambda_{\text{exc}}=350\text{nm}$ , blue line;  $\lambda_{\text{exc}}=450\text{nm}$ , green line) spectra of [Cl-(CH<sub>2</sub>)<sub>2</sub>-NH<sub>3</sub>]<sub>2</sub>SnCl<sub>6</sub> (1) cast film from Ethanol

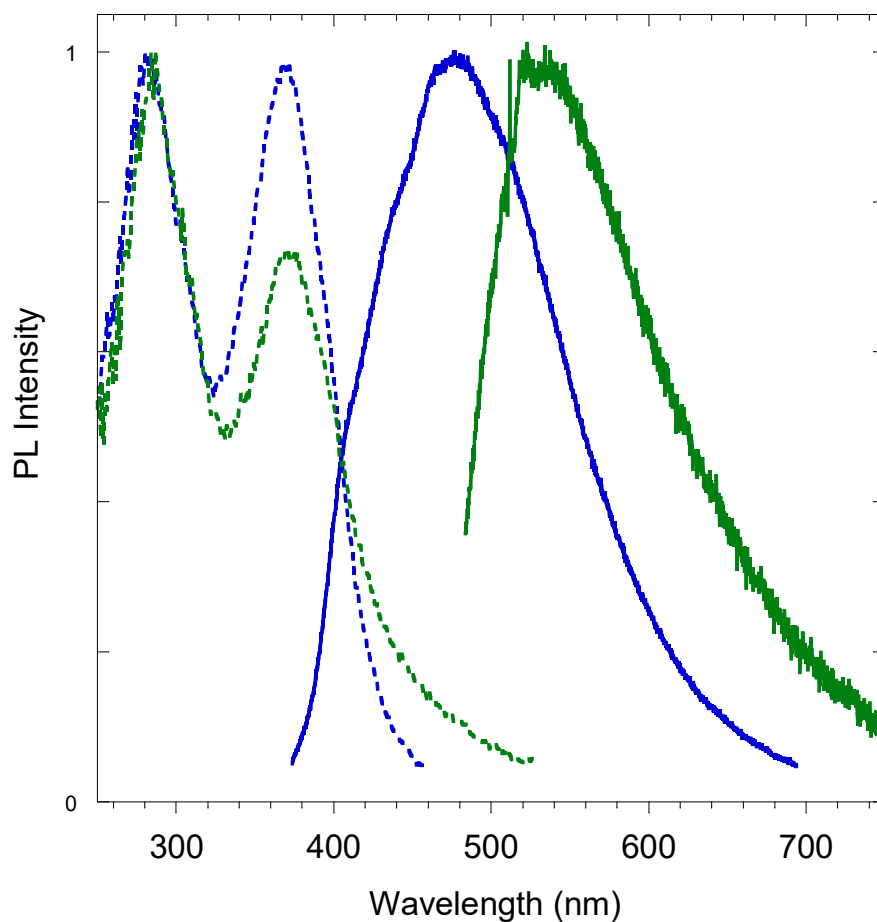

**Figure S6.** Normalized PL and PL excitation spectra of  $[\text{Cl}-(\text{CH}_2)_2-\text{NH}_3]_2\text{SnBr}_{5.65}\text{Cl}_{0.35}$  (**2**) crystalline powders.  $\lambda_{\text{ex}} = 350\text{nm}$ , blue line  $\lambda_{\text{ex}} = 450\text{nm}$ , green line;  $\lambda_{\text{em}} = 475\text{nm}$ , blue dashed line;  $\lambda_{\text{em}} = 560\text{nm}$ , green dashed line.

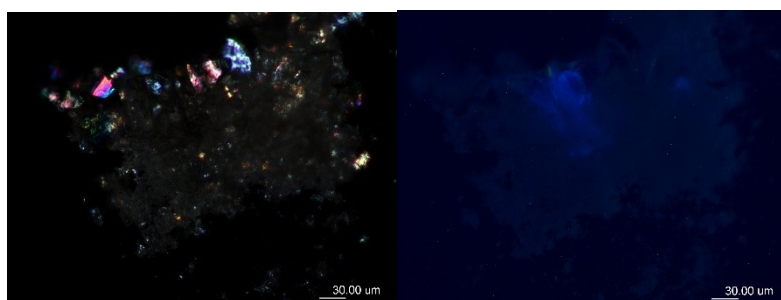

**Figure S7.** Images  $[\text{Cl}-(\text{CH}_2)_2-\text{NH}_3]_2\text{SnBr}_{5.65}\text{Cl}_{0.35}$  (**2**) crystals taken with optical and fluorescence microscopy. From the left to the right: cross polarized optical image; fluorescence image, UV light excitation. Scale bar is  $30\mu\text{m}$ .

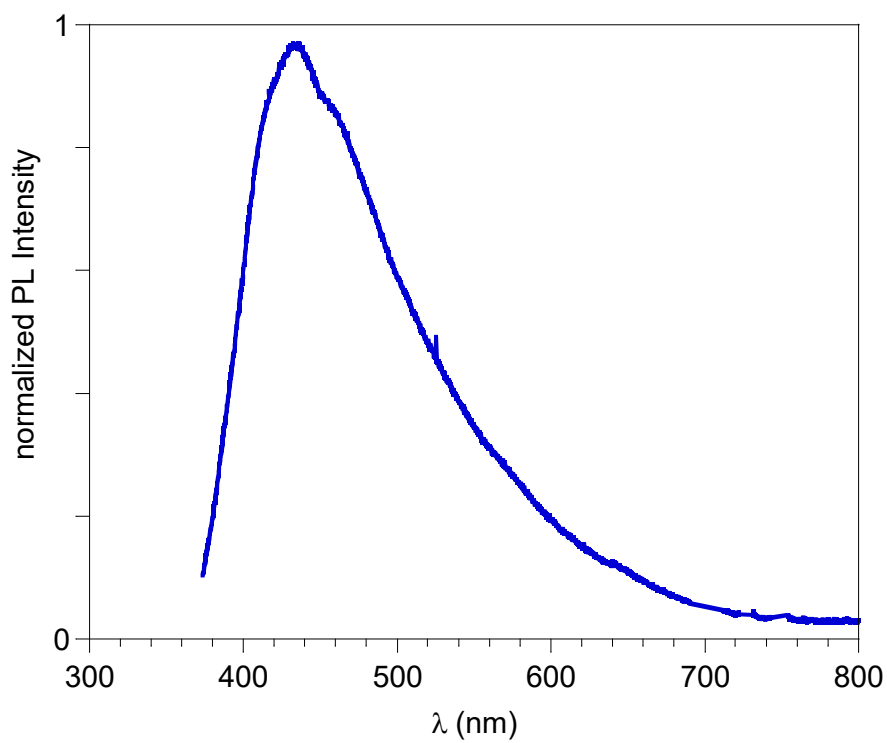

**Figure S8.** Normalized photoluminescence (PL) spectrum of  $[\text{Cl}-(\text{CH}_2)_2\text{-NH}_3]_2\text{SnBr}_{5.65}\text{Cl}_{0.35}$  (2) cast films from water solution;  $\lambda_{\text{ex}} = 350\text{nm}$ .
